# Supplementary material
Source: PubMed Central journal article supplement (PMC6126729)
Supplement: pnas.1803152115.sapp.pdf [file pnas.1803152115.sapp.pdf]

1  
2  
3  
4  
5  
6  
7  
8  
9  
10  
11  
12  
13  
14  
15  
16  
17  
18  
19  
20  
21  
22  
23  
24  
25  
26  
27  
28  
29  
30  
31  
32  
33  
34  
35  
36  
37  
38  
39  
40  
41  
42  
43  
44  
45  
46  
47  
48  
49  
50  
51  
52  
53  
54  
55  
56  
57  
58  
59  
60  
61  
62

63  
64  
65  
66  
67  
68  
69  
70  
71  
72  
73  
74  
75  
76  
77  
78  
79  
80  
81  
82  
83  
84  
85  
86  
87  
88  
89  
90  
91  
92  
93  
94  
95  
96  
97  
98  
99  
100  
101  
102  
103  
104  
105  
106  
107  
108  
109  
110  
111  
112  
113  
114  
115  
116  
117  
118  
119  
120  
121  
122  
123  
124

**Supplementary Information for**

**Altered conformational landscape and dimerization dependency underpins the activation of EGFR by  $\alpha$ C- $\beta$ 4 loop insertion mutations**

**Zheng Ruan and Natarajan Kannan**

**To whom correspondence should be addressed:**

**Natarajan Kannan**

**E-mail: nkannan@uga.edu**

**This PDF file includes:**

- Figs. S1 to S10
- Tables S1 to S3
- Caption for Database S1

**Other supplementary materials for this manuscript include the following:**

- Database S1

125  
126  
127  
128  
129  
130  
131  
132  
133  
134  
135  
136  
137  
138  
139  
140  
141  
142  
143  
144  
145  
146  
147  
148  
149  
150  
151  
152  
153  
154  
155  
156  
157  
158  
159  
160  
161  
162  
163  
164  
165  
166  
167  
168  
169  
170  
171  
172  
173  
174  
175  
176  
177  
178  
179  
180  
181  
182  
183  
184  
185  
186

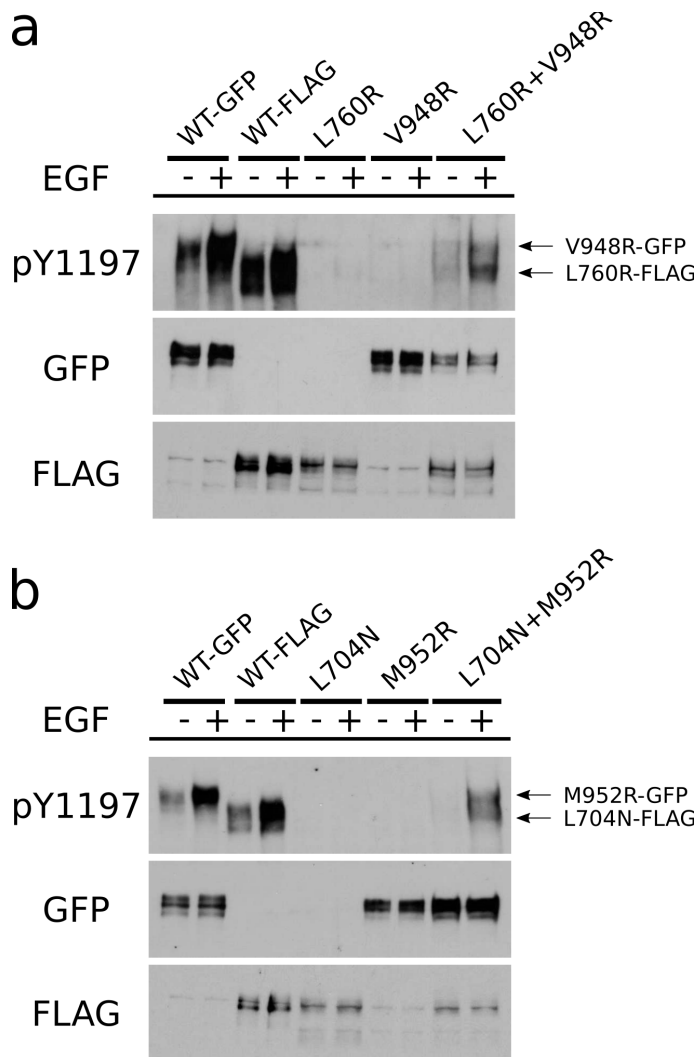

187  
188  
189  
190  
191  
192  
193  
194  
195  
196  
197  
198  
199  
200  
201  
202  
203  
204  
205  
206  
207  
208  
209  
210  
211  
212  
213  
214  
215  
216  
217  
218  
219  
220  
221  
222  
223  
224  
225  
226  
227  
228  
229  
230  
231  
232  
233  
234  
235  
236  
237  
238  
239  
240  
241  
242  
243  
244  
245  
246  
247  
248

**Fig. S1.** Western blot analysis of WT EGFR with N-lobe (L760R and L704N) and C-lobe (V948R and M952R) dimerization deficient mutations. 5% SDS-PAGE is used to analyze Y1197 phosphorylation. The bands corresponding to GFP and FLAG tagged EGFR are labeled by the arrows in (a) and (b).

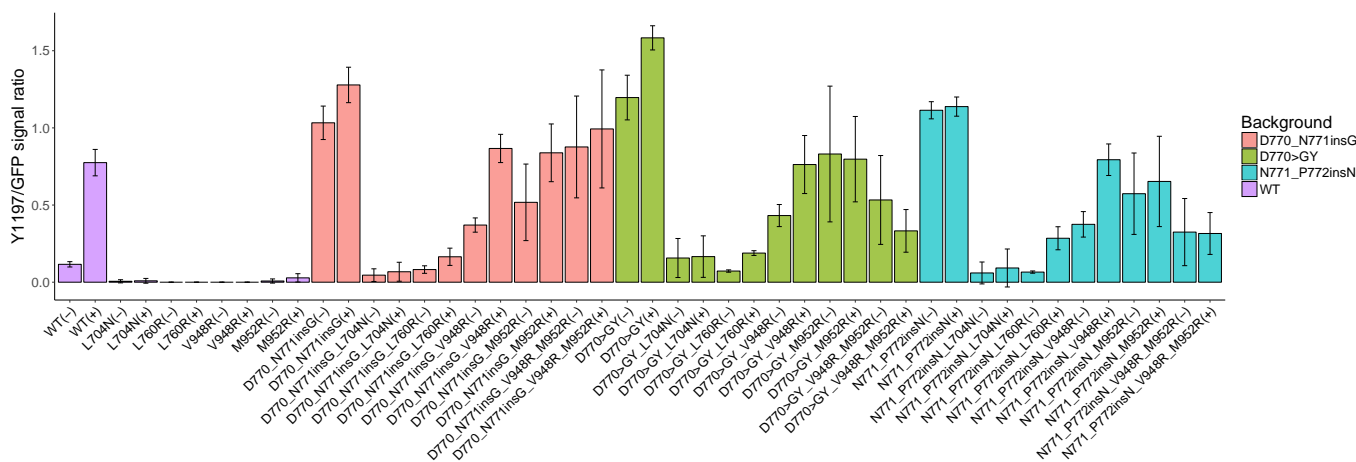

**Fig. S2.** Densitometry analysis of the Western Blotting results in Fig. 3a. Error bar represents standard error (SE) of 3-5 independent experiments.

249  
250  
251  
252  
253  
254  
255  
256  
257  
258  
259  
260  
261  
262  
263  
264  
265  
266  
267  
268  
269  
270  
271  
272  
273  
274  
275  
276  
277  
278  
279  
280  
281  
282  
283  
284  
285  
286  
287  
288  
289  
290  
291  
292  
293  
294  
295  
296  
297  
298  
299  
300  
301  
302  
303  
304  
305  
306  
307  
308  
309  
310

311  
312  
313  
314  
315  
316  
317  
318  
319  
320  
321  
322  
323  
324  
325  
326  
327  
328  
329  
330  
331  
332  
333  
334  
335  
336  
337  
338  
339  
340  
341  
342  
343  
344  
345  
346  
347  
348  
349  
350  
351  
352  
353  
354  
355  
356  
357  
358  
359  
360  
361  
362  
363  
364  
365  
366  
367  
368  
369  
370  
371  
372

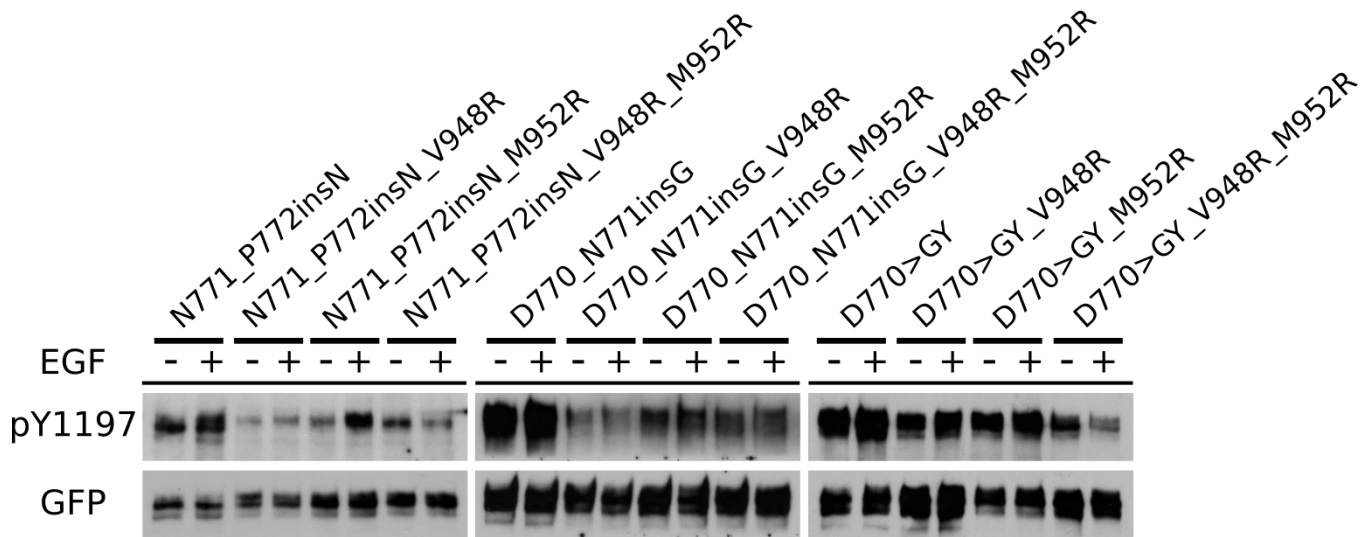

**Fig. S3.** Activating insertion mutations are tolerant to C-lobe dimerization-deficient mutations. EGFR C-lobe dimerization-deficient mutations, V948R or M952R or V948R+M952R, are introduced to N771\_P772insN, D770\_N771insG, and D770>GY mutants background. Auto-phosphorylation of Y1197 is probed through phospho-specific antibody. The total expression of the designated constructs is detected using GFP antibody.

373  
374  
375  
376  
377  
378  
379  
380  
381  
382  
383  
384  
385  
386  
387  
388  
389  
390  
391  
392  
393  
394  
395  
396  
397  
398  
399  
400  
401  
402  
403  
404  
405  
406  
407  
408  
409  
410  
411  
412  
413  
414  
415  
416  
417  
418  
419  
420  
421  
422  
423  
424  
425  
426  
427  
428  
429  
430  
431  
432  
433  
434

435  
436  
437  
438  
439  
440  
441  
442  
443  
444  
445  
446  
447  
448  
449  
450  
451  
452  
453  
454  
455  
456  
457  
458  
459  
460  
461  
462  
463  
464  
465  
466  
467  
468  
469  
470  
471  
472  
473  
474  
475  
476  
477  
478  
479  
480  
481  
482  
483  
484  
485  
486  
487  
488  
489  
490  
491  
492  
493  
494  
495  
496

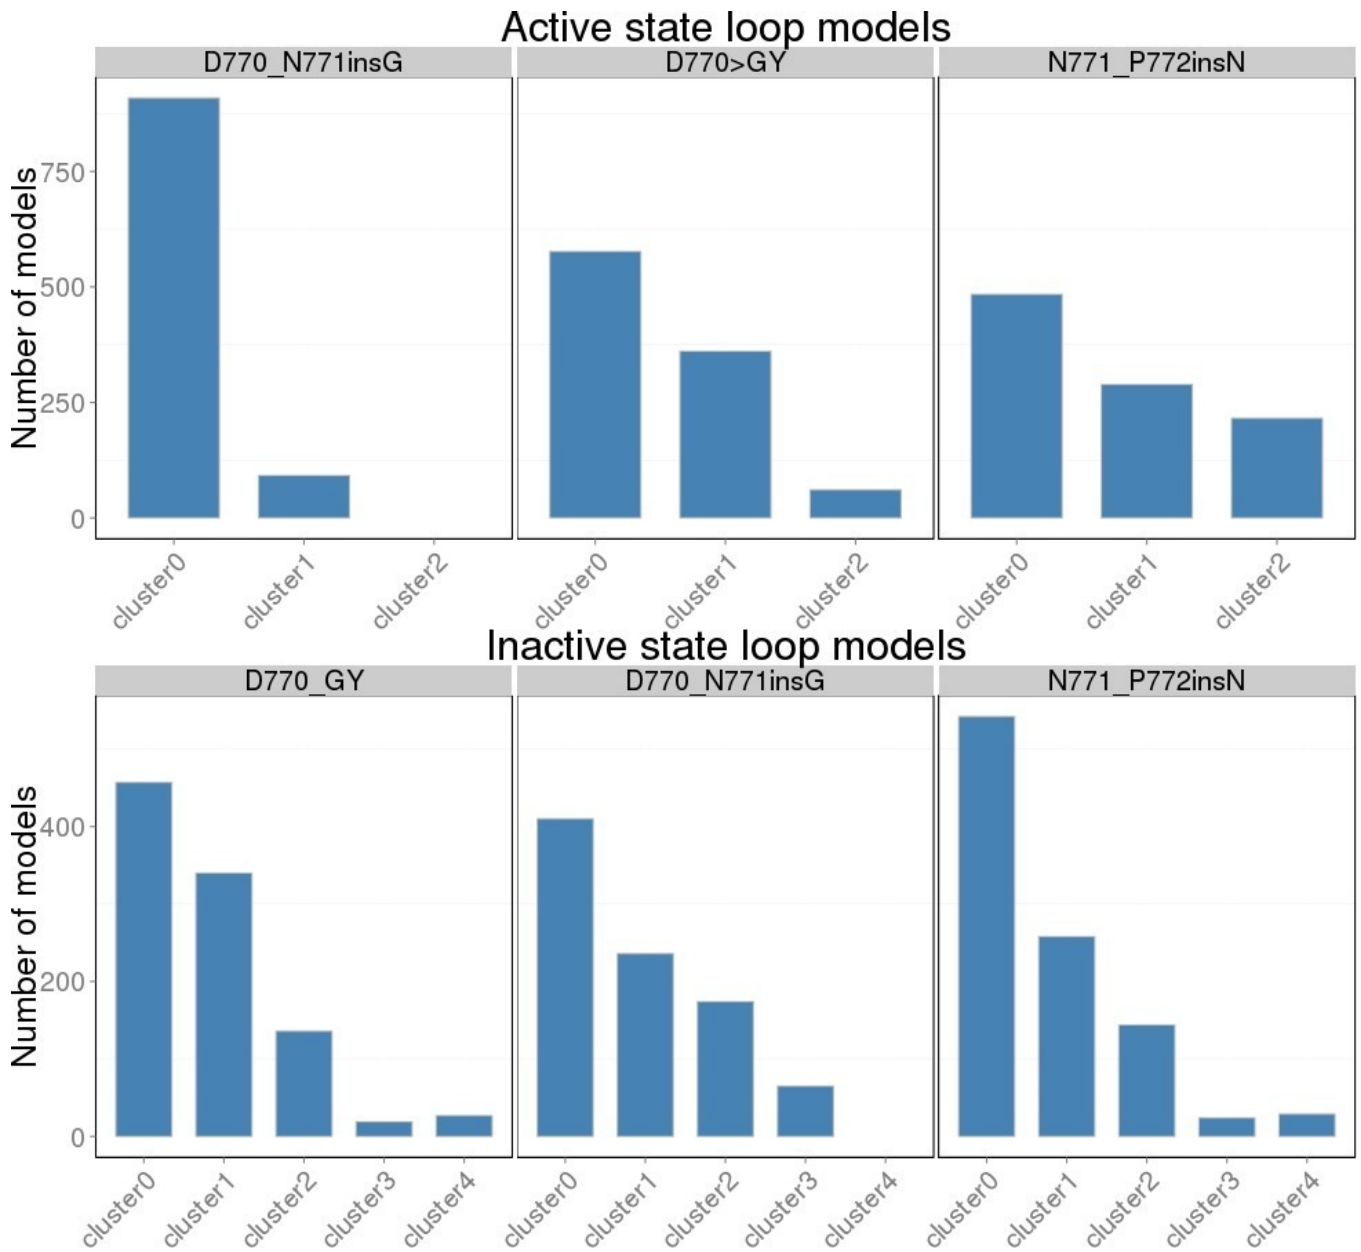

**Fig. S4.** The number of clusters identified from 1000  $\alpha$ C- $\beta$ 4 loop insertion mutation models in active/inactive states.

497  
498  
499  
500  
501  
502  
503  
504  
505  
506  
507  
508  
509  
510  
511  
512  
513  
514  
515  
516  
517  
518  
519  
520  
521  
522  
523  
524  
525  
526  
527  
528  
529  
530  
531  
532  
533  
534  
535  
536  
537  
538  
539  
540  
541  
542  
543  
544  
545  
546  
547  
548  
549  
550  
551  
552  
553  
554  
555  
556  
557  
558

559  
560  
561  
562  
563  
564  
565  
566  
567  
568  
569  
570  
571  
572  
573  
574  
575  
576  
577  
578  
579  
580  
581  
582  
583  
584  
585  
586  
587  
588  
589  
590  
591  
592  
593  
594  
595  
596  
597  
598  
599  
600  
601  
602  
603  
604  
605  
606  
607  
608  
609  
610  
611  
612  
613  
614  
615  
616  
617  
618  
619  
620

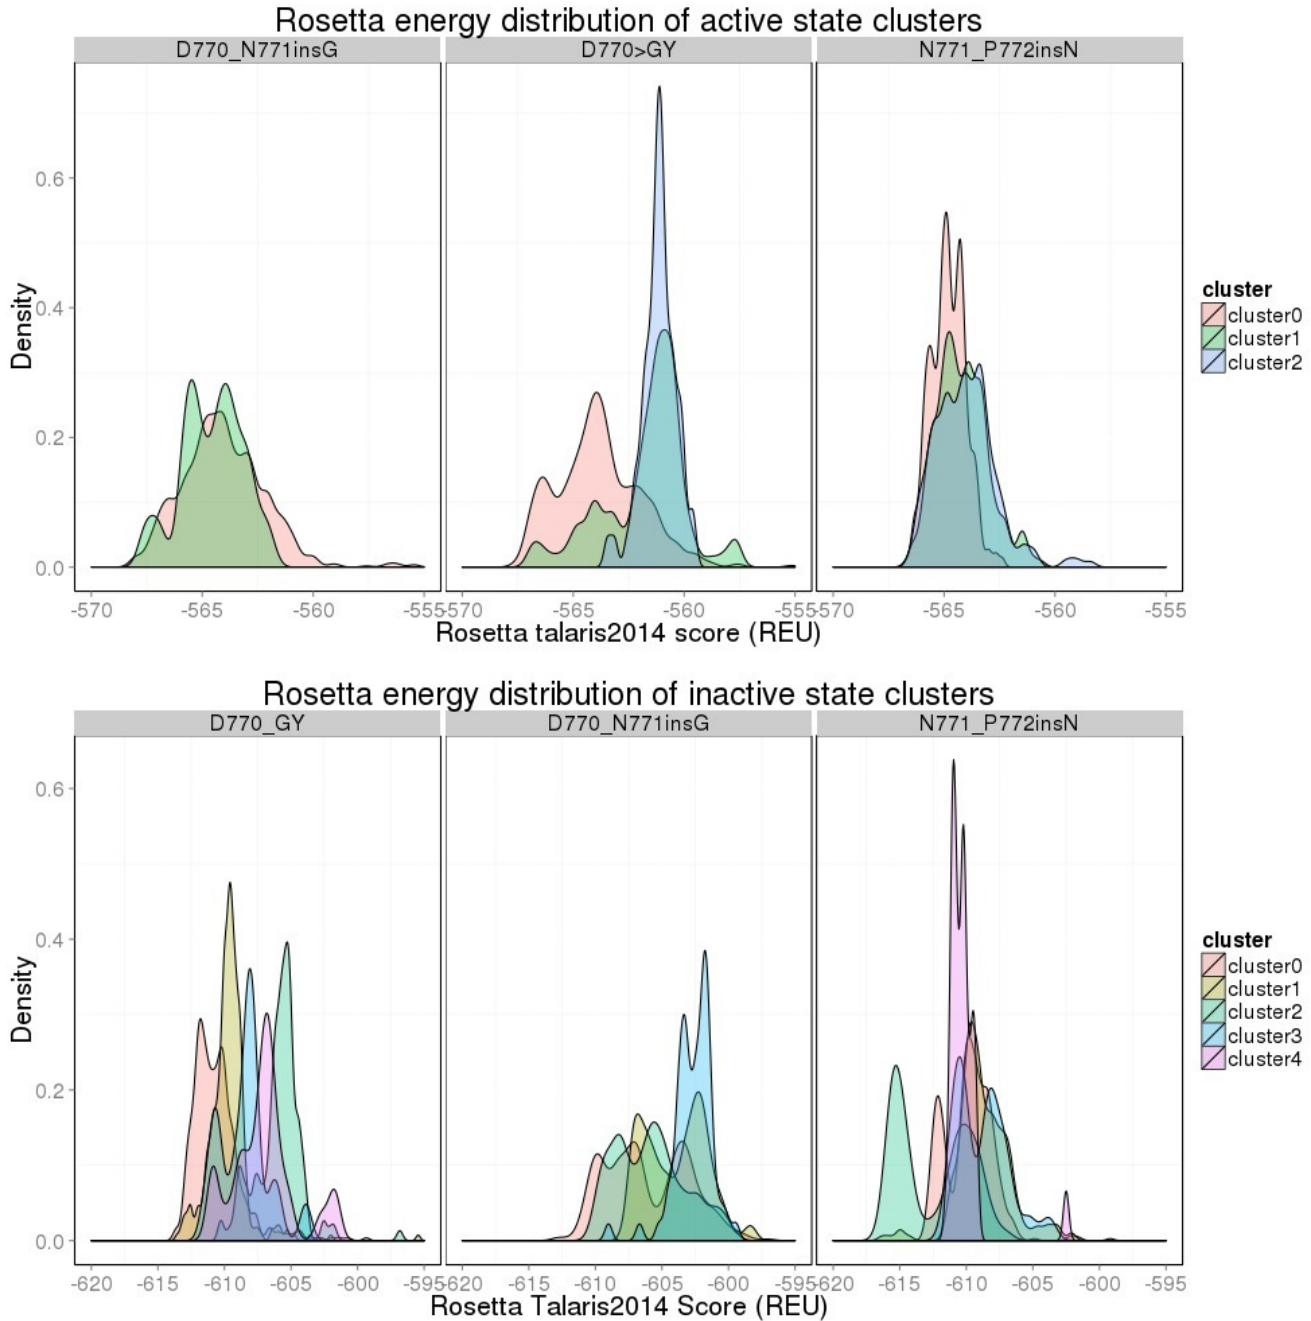

Fig. S5. The rosetta energy distribution of each cluster identified in Fig. S4.

621  
622  
623  
624  
625  
626  
627  
628  
629  
630  
631  
632  
633  
634  
635  
636  
637  
638  
639  
640  
641  
642  
643  
644  
645  
646  
647  
648  
649  
650  
651  
652  
653  
654  
655  
656  
657  
658  
659  
660  
661  
662  
663  
664  
665  
666  
667  
668  
669  
670  
671  
672  
673  
674  
675  
676  
677  
678  
679  
680  
681  
682

683  
684  
685  
686  
687  
688  
689  
690  
691  
692  
693  
694  
695  
696  
697  
698  
699  
700  
701  
702  
703  
704  
705  
706  
707  
708  
709  
710  
711  
712  
713  
714  
715  
716  
717  
718  
719  
720  
721  
722  
723  
724  
725  
726  
727  
728  
729  
730  
731  
732  
733  
734  
735  
736  
737  
738  
739  
740  
741  
742  
743  
744

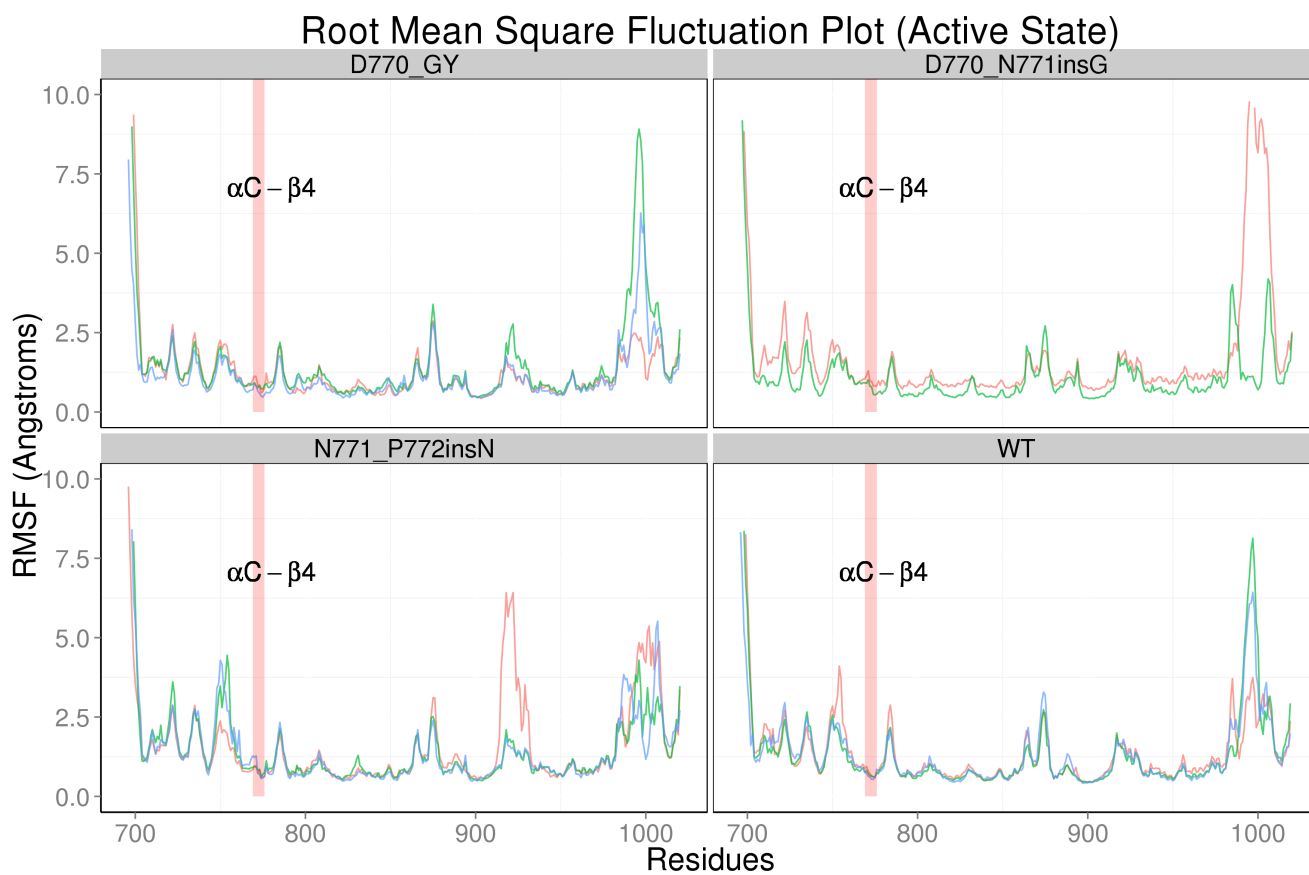

Fig. S6. Root mean square fluctuation (RMSF) plot of WT EGFR and three activating insertion mutations in the active state. Residues correspond to the  $\alpha$ C- $\beta$ 4 loop are highlighted in red.

745  
746  
747  
748  
749  
750  
751  
752  
753  
754  
755  
756  
757  
758  
759  
760  
761  
762  
763  
764  
765  
766  
767  
768  
769  
770  
771  
772  
773  
774  
775  
776  
777  
778  
779  
780  
781  
782  
783  
784  
785  
786  
787  
788  
789  
790  
791  
792  
793  
794  
795  
796  
797  
798  
799  
800  
801  
802  
803  
804  
805  
806

807  
808  
809  
810  
811  
812  
813  
814  
815  
816  
817  
818  
819  
820  
821  
822  
823  
824  
825  
826  
827  
828  
829  
830  
831  
832  
833  
834  
835  
836  
837  
838  
839  
840  
841  
842  
843  
844  
845  
846  
847  
848  
849  
850  
851  
852  
853  
854  
855  
856  
857  
858  
859  
860  
861  
862  
863  
864  
865  
866  
867  
868

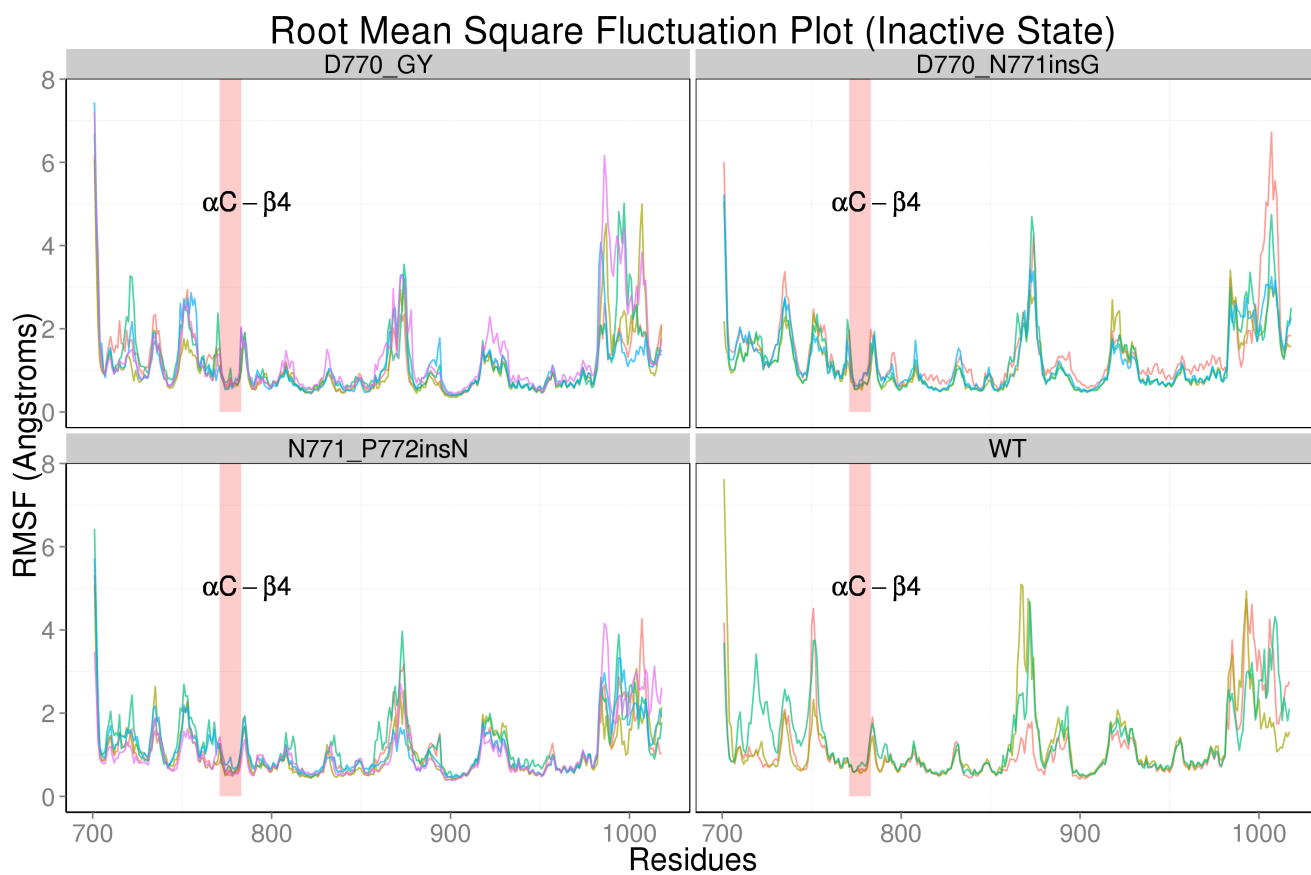

**Fig. S7.** Root mean square fluctuation (RMSF) plot of EGFR and three activating insertion mutations in the inactive state. Residues correspond to the  $\alpha$ C- $\beta$ 4 loop are highlighted in red.

869  
870  
871  
872  
873  
874  
875  
876  
877  
878  
879  
880  
881  
882  
883  
884  
885  
886  
887  
888  
889  
890  
891  
892  
893  
894  
895  
896  
897  
898  
899  
900  
901  
902  
903  
904  
905  
906  
907  
908  
909  
910  
911  
912  
913  
914  
915  
916  
917  
918  
919  
920  
921  
922  
923  
924  
925  
926  
927  
928  
929  
930

931  
932  
933  
934  
935  
936  
937  
938  
939  
940  
941  
942  
943  
944  
945  
946  
947  
948  
949  
950  
951  
952  
953  
954  
955  
956  
957  
958  
959  
960  
961  
962  
963  
964  
965  
966  
967  
968  
969  
970  
971  
972  
973  
974  
975  
976  
977  
978  
979  
980  
981  
982  
983  
984  
985  
986  
987  
988  
989  
990  
991  
992

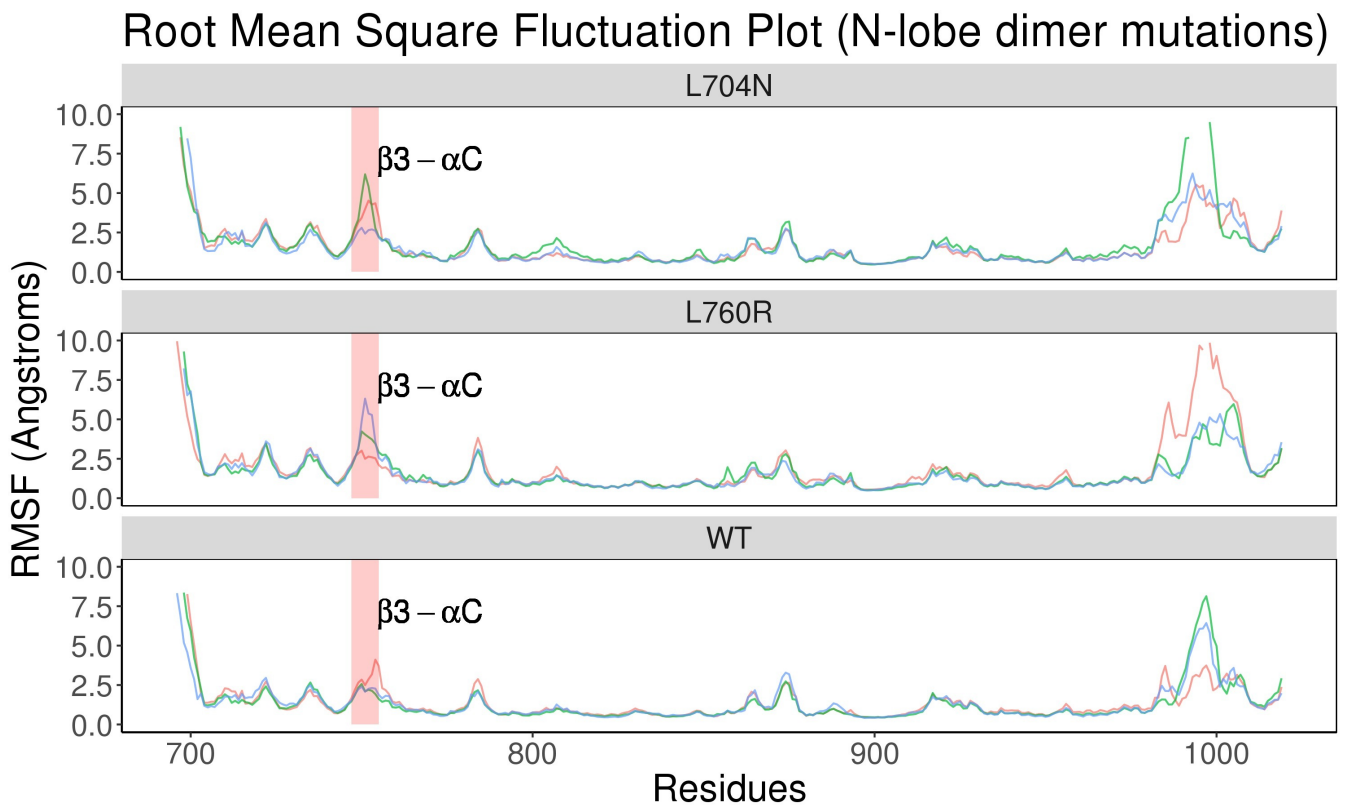

Fig. S8. Root mean square fluctuation (RMSF) plot of EGFR and two N-lobe dimerization deficient mutations. Residues correspond to the  $\beta 3 - \alpha C$  loop are highlighted in red.



993  
994  
995  
996  
997  
998  
999  
1000  
1001  
1002  
1003  
1004  
1005  
1006  
1007  
1008  
1009  
1010  
1011  
1012  
1013  
1014  
1015  
1016  
1017  
1018  
1019  
1020  
1021  
1022  
1023  
1024  
1025  
1026  
1027  
1028  
1029  
1030  
1031  
1032  
1033  
1034  
1035  
1036  
1037  
1038  
1039  
1040  
1041  
1042  
1043  
1044  
1045  
1046  
1047  
1048  
1049  
1050  
1051  
1052  
1053  
1054

1055  
1056  
1057  
1058  
1059  
1060  
1061  
1062  
1063  
1064  
1065  
1066  
1067  
1068  
1069  
1070  
1071  
1072  
1073  
1074  
1075  
1076  
1077  
1078  
1079  
1080  
1081  
1082  
1083  
1084  
1085  
1086  
1087  
1088  
1089  
1090  
1091  
1092  
1093  
1094  
1095  
1096  
1097  
1098  
1099  
1100  
1101  
1102  
1103  
1104  
1105  
1106  
1107  
1108  
1109  
1110  
1111  
1112  
1113  
1114  
1115  
1116

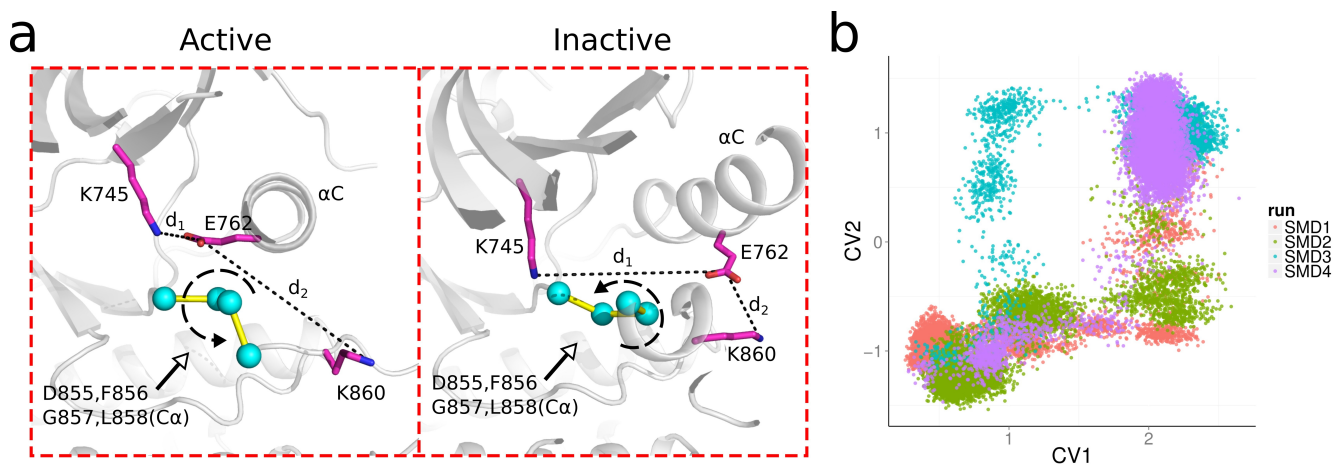

**Fig. S9.** a) The two collective variables used in our US simulation are shown in the active and inactive structures of EGFR. CV1: the dihedral angle of  $C\alpha[D855]-C\alpha[F856]-C\alpha[G857]-C\alpha[L858]$ . CV2:  $d_2[E762-K860]-d_1[K745-E762]$ . b) Visualization of four independent steered MD simulation through CV1 and CV2.

1117  
1118  
1119  
1120  
1121  
1122  
1123  
1124  
1125  
1126  
1127  
1128  
1129  
1130  
1131  
1132  
1133  
1134  
1135  
1136  
1137  
1138  
1139  
1140  
1141  
1142  
1143  
1144  
1145  
1146  
1147  
1148  
1149  
1150  
1151  
1152  
1153  
1154  
1155  
1156  
1157  
1158  
1159  
1160  
1161  
1162  
1163  
1164  
1165  
1166  
1167  
1168  
1169  
1170  
1171  
1172  
1173  
1174  
1175  
1176  
1177  
1178

1179  
1180  
1181  
1182  
1183  
1184  
1185  
1186  
1187  
1188  
1189  
1190  
1191  
1192  
1193  
1194  
1195  
1196  
1197  
1198  
1199  
1200  
1201  
1202  
1203  
1204  
1205  
1206  
1207  
1208  
1209  
1210  
1211  
1212  
1213  
1214  
1215  
1216  
1217  
1218  
1219  
1220  
1221  
1222  
1223  
1224  
1225  
1226  
1227  
1228  
1229  
1230  
1231  
1232  
1233  
1234  
1235  
1236  
1237  
1238  
1239  
1240

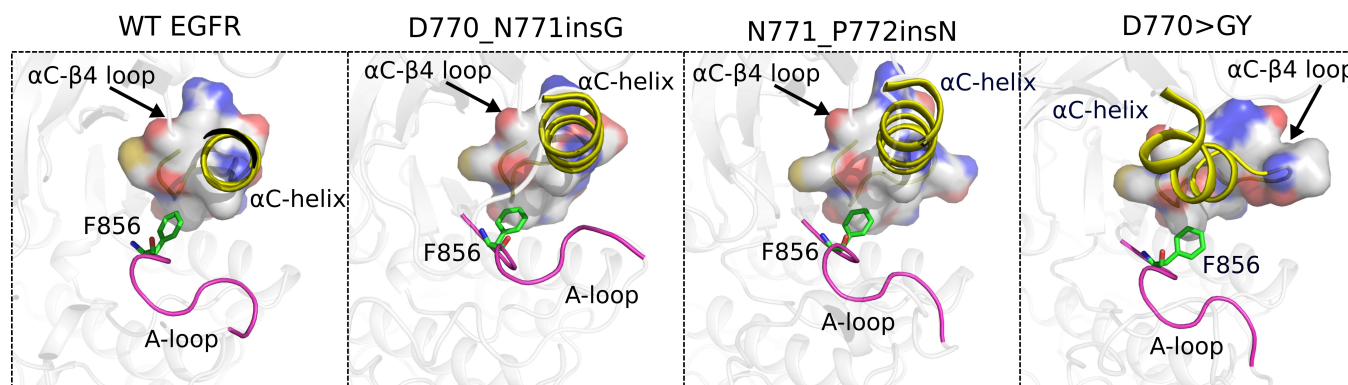

**Fig. S10.** The alternative inactive state stabilized by activating  $\alpha$ C- $\beta$ 4 loop insertion mutations.

1241  
1242  
1243  
1244  
1245  
1246  
1247  
1248  
1249  
1250  
1251  
1252  
1253  
1254  
1255  
1256  
1257  
1258  
1259  
1260  
1261  
1262  
1263  
1264  
1265  
1266  
1267  
1268  
1269  
1270  
1271  
1272  
1273  
1274  
1275  
1276  
1277  
1278  
1279  
1280  
1281  
1282  
1283  
1284  
1285  
1286  
1287  
1288  
1289  
1290  
1291  
1292  
1293  
1294  
1295  
1296  
1297  
1298  
1299  
1300  
1301  
1302

1303  
1304  
1305  
1306  
1307  
1308  
1309  
1310  
1311  
1312  
1313  
1314  
1315  
1316  
1317  
1318  
1319  
1320  
1321  
1322  
1323  
1324  
1325  
1326  
1327  
1328  
1329  
1330  
1331  
1332  
1333  
1334  
1335  
1336  
1337  
1338  
1339  
1340  
1341  
1342  
1343  
1344  
1345  
1346  
1347  
1348  
1349  
1350  
1351  
1352  
1353  
1354  
1355  
1356  
1357  
1358  
1359  
1360  
1361  
1362  
1363  
1364

**Table S1. The statistics of  $\Delta G_{\text{active-inactive}}$  of Fig. 7b.**

| Phenotype     | $\Delta G_{\text{active-inactive}}$ (kJ mol <sup>-1</sup> ) |
|---------------|-------------------------------------------------------------|
| WT EGFR       | 6.02±0.18                                                   |
| D770_N771insG | 4.11±0.41                                                   |
| D770>GY       | 2.45±0.44                                                   |
| N771_P772insN | 2.83±0.72                                                   |

1365  
1366  
1367  
1368  
1369  
1370  
1371  
1372  
1373  
1374  
1375  
1376  
1377  
1378  
1379  
1380  
1381  
1382  
1383  
1384  
1385  
1386  
1387  
1388  
1389  
1390  
1391  
1392  
1393  
1394  
1395  
1396  
1397  
1398  
1399  
1400  
1401  
1402  
1403  
1404  
1405  
1406  
1407  
1408  
1409  
1410  
1411  
1412  
1413  
1414  
1415  
1416  
1417  
1418  
1419  
1420  
1421  
1422  
1423  
1424  
1425  
1426

1427  
1428  
1429  
1430  
1431  
1432  
1433  
1434  
1435  
1436  
1437  
1438  
1439  
1440  
1441  
1442  
1443  
1444  
1445  
1446  
1447  
1448  
1449  
1450  
1451  
1452  
1453  
1454  
1455  
1456  
1457  
1458  
1459  
1460  
1461  
1462  
1463  
1464  
1465  
1466  
1467  
1468  
1469  
1470  
1471  
1472  
1473  
1474  
1475  
1476  
1477  
1478  
1479  
1480  
1481  
1482  
1483  
1484  
1485  
1486  
1487  
1488

**Table S2. Information of all-atom MD simulations performed in the study**

| Phenotype     | State    | Length                 |
|---------------|----------|------------------------|
| WT EGFR       | Active   | 1 $\mu$ s $\times$ 3   |
|               | Inactive | 1 $\mu$ s $\times$ 3   |
| D770_N771insG | Active   | 1.5 $\mu$ s $\times$ 2 |
|               | Inactive | 1 $\mu$ s $\times$ 4   |
| D770>GY       | Active   | 1 $\mu$ s $\times$ 3   |
|               | Inactive | 1 $\mu$ s $\times$ 5   |
| N771_P772insN | Active   | 1 $\mu$ s $\times$ 3   |
|               | Inactive | 1 $\mu$ s $\times$ 5   |
| L704N         | Active   | 1 $\mu$ s $\times$ 3   |
| L760R         | Active   | 1 $\mu$ s $\times$ 3   |

|      |      |
|------|------|
| 1489 | 1551 |
| 1490 | 1552 |
| 1491 | 1553 |
| 1492 | 1554 |
| 1493 | 1555 |
| 1494 | 1556 |
| 1495 | 1557 |
| 1496 | 1558 |
| 1497 | 1559 |
| 1498 | 1560 |
| 1499 | 1561 |
| 1500 | 1562 |
| 1501 | 1563 |
| 1502 | 1564 |
| 1503 | 1565 |
| 1504 | 1566 |
| 1505 | 1567 |
| 1506 | 1568 |
| 1507 | 1569 |
| 1508 | 1570 |
| 1509 | 1571 |
| 1510 | 1572 |
| 1511 | 1573 |
| 1512 | 1574 |
| 1513 | 1575 |
| 1514 | 1576 |
| 1515 | 1577 |
| 1516 | 1578 |
| 1517 | 1579 |
| 1518 | 1580 |
| 1519 | 1581 |
| 1520 | 1582 |
| 1521 | 1583 |
| 1522 | 1584 |
| 1523 | 1585 |
| 1524 | 1586 |
| 1525 | 1587 |
| 1526 | 1588 |
| 1527 | 1589 |
| 1528 | 1590 |
| 1529 | 1591 |
| 1530 | 1592 |
| 1531 | 1593 |
| 1532 | 1594 |
| 1533 | 1595 |
| 1534 | 1596 |
| 1535 | 1597 |
| 1536 | 1598 |
| 1537 | 1599 |
| 1538 | 1600 |
| 1539 | 1601 |
| 1540 | 1602 |
| 1541 | 1603 |
| 1542 | 1604 |
| 1543 | 1605 |
| 1544 | 1606 |
| 1545 | 1607 |
| 1546 | 1608 |
| 1547 | 1609 |
| 1548 | 1610 |
| 1549 | 1611 |
| 1550 | 1612 |

**Table S3. Information of steered MD (SMD) simulations performed in the study**

| Simulation | Transition         | Collective variable                                                          | Spring constant (kJ/mol Å <sup>2</sup> ) | Length |
|------------|--------------------|------------------------------------------------------------------------------|------------------------------------------|--------|
| SMD1       | Active to Inactive | All C $\alpha$ RMSD (Residue 701-1017)                                       | 10000                                    | 10ns   |
| SMD2       | Active to Inactive | C $\alpha$ RMSD of $\alpha$ C-helix and A-loop (Residue 756-769 and 855-863) | 5000                                     | 15ns   |
| SMD3       | Inactive to Active | All C $\alpha$ RMSD (Residue 701-1017)                                       | 10000                                    | 10ns   |
| SMD4       | Inactive to Active | C $\alpha$ RMSD of $\alpha$ C-helix and A-loop (Residue 756-769 and 855-863) | 5000                                     | 15ns   |

|      |                                                                        |      |
|------|------------------------------------------------------------------------|------|
| 1613 | <b>Additional data table S1 (EGFR_Insertion_Mutations.xlsx)</b>        | 1675 |
| 1614 | The number of distinct EGFR insertion mutations in COSMIC database v83 | 1676 |
| 1615 |                                                                        | 1677 |
| 1616 |                                                                        | 1678 |
| 1617 |                                                                        | 1679 |
| 1618 |                                                                        | 1680 |
| 1619 |                                                                        | 1681 |
| 1620 |                                                                        | 1682 |
| 1621 |                                                                        | 1683 |
| 1622 |                                                                        | 1684 |
| 1623 |                                                                        | 1685 |
| 1624 |                                                                        | 1686 |
| 1625 |                                                                        | 1687 |
| 1626 |                                                                        | 1688 |
| 1627 |                                                                        | 1689 |
| 1628 |                                                                        | 1690 |
| 1629 |                                                                        | 1691 |
| 1630 |                                                                        | 1692 |
| 1631 |                                                                        | 1693 |
| 1632 |                                                                        | 1694 |
| 1633 |                                                                        | 1695 |
| 1634 |                                                                        | 1696 |
| 1635 |                                                                        | 1697 |
| 1636 |                                                                        | 1698 |
| 1637 |                                                                        | 1699 |
| 1638 |                                                                        | 1700 |
| 1639 |                                                                        | 1701 |
| 1640 |                                                                        | 1702 |
| 1641 |                                                                        | 1703 |
| 1642 |                                                                        | 1704 |
| 1643 |                                                                        | 1705 |
| 1644 |                                                                        | 1706 |
| 1645 |                                                                        | 1707 |
| 1646 |                                                                        | 1708 |
| 1647 |                                                                        | 1709 |
| 1648 |                                                                        | 1710 |
| 1649 |                                                                        | 1711 |
| 1650 |                                                                        | 1712 |
| 1651 |                                                                        | 1713 |
| 1652 |                                                                        | 1714 |
| 1653 |                                                                        | 1715 |
| 1654 |                                                                        | 1716 |
| 1655 |                                                                        | 1717 |
| 1656 |                                                                        | 1718 |
| 1657 |                                                                        | 1719 |
| 1658 |                                                                        | 1720 |
| 1659 |                                                                        | 1721 |
| 1660 |                                                                        | 1722 |
| 1661 |                                                                        | 1723 |
| 1662 |                                                                        | 1724 |
| 1663 |                                                                        | 1725 |
| 1664 |                                                                        | 1726 |
| 1665 |                                                                        | 1727 |
| 1666 |                                                                        | 1728 |
| 1667 |                                                                        | 1729 |
| 1668 |                                                                        | 1730 |
| 1669 |                                                                        | 1731 |
| 1670 |                                                                        | 1732 |
| 1671 |                                                                        | 1733 |
| 1672 |                                                                        | 1734 |
| 1673 |                                                                        | 1735 |
| 1674 |                                                                        | 1736 |
